# Supplementary material
Source: PubMed Central journal article supplement (PMC9357204)
Supplement: NIHMS1816359-supplement-Supplementary_Figures.pdf [file NIHMS1816359-supplement-Supplementary_Figures.pdf]

**A**

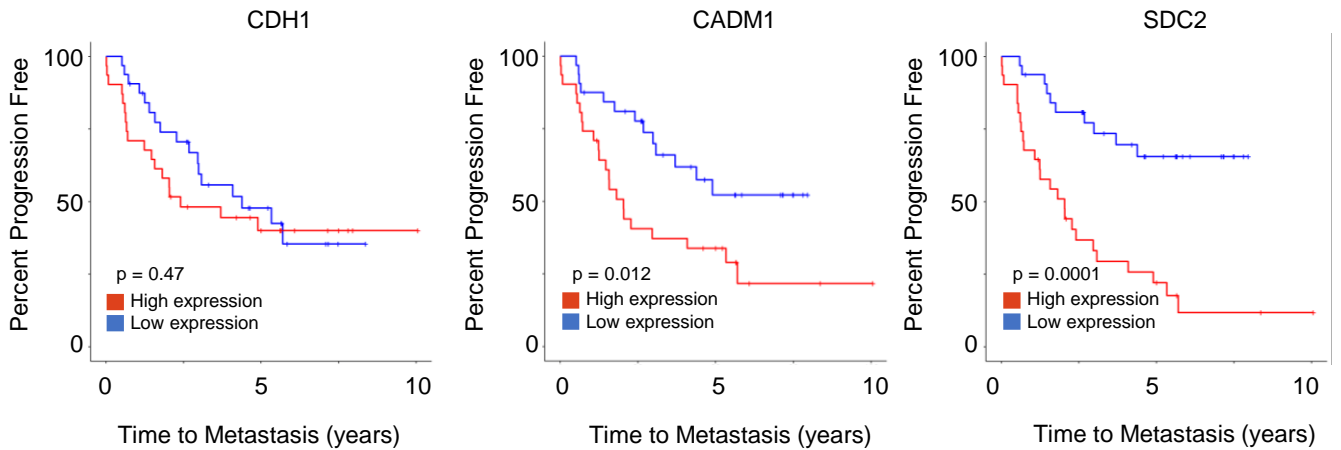

**B**

| PFS Predictor                               | Hazard Ratio | 95% LL | 95% UL | p-value |
|---------------------------------------------|--------------|--------|--------|---------|
| <i>SDC2</i> Expression (log <sub>10</sub> ) | 2.96         | 1.26   | 6.96   | 0.0128  |
| Number of Chr. 8q Copies                    | 1.35         | 0.98   | 1.85   | 0.0659  |

**C**

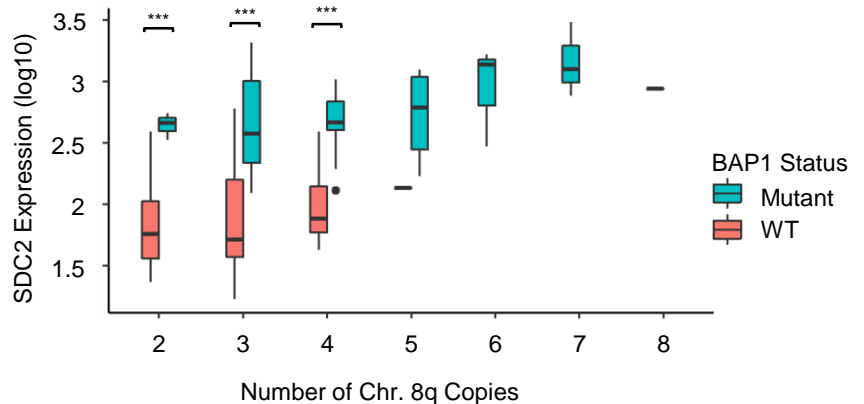

**Supplementary Figure 1: Alternate data set shows increased expression *CADM1* and**

***SDC2* results in worse progression free survival. (A)** Kaplan-Meier plots showing metastasis-free survival for patients stratified by median RNA expression of *CDH1* (left panel), *CADM1* (middle panel) and *SDC2* (right panel), in an independent cohort of 63 UM patients (80).

**(B)** Table showing cox proportional hazards (PH) model analysis results for the association between progression-free survival, log<sub>10</sub>-transformed *SDC2* gene expression and chromosome 8q copy number alteration status for TCGA cohort. **(C)** Box plot showing log<sub>10</sub>-transformed expression of *SDC2* (y-axis) and the number of copies of chromosome 8q (x-axis). Samples are grouped based on *BAP1* mutation status. PFS, Progression Free Survival; \*\*\* p-value < 0.001

**A**

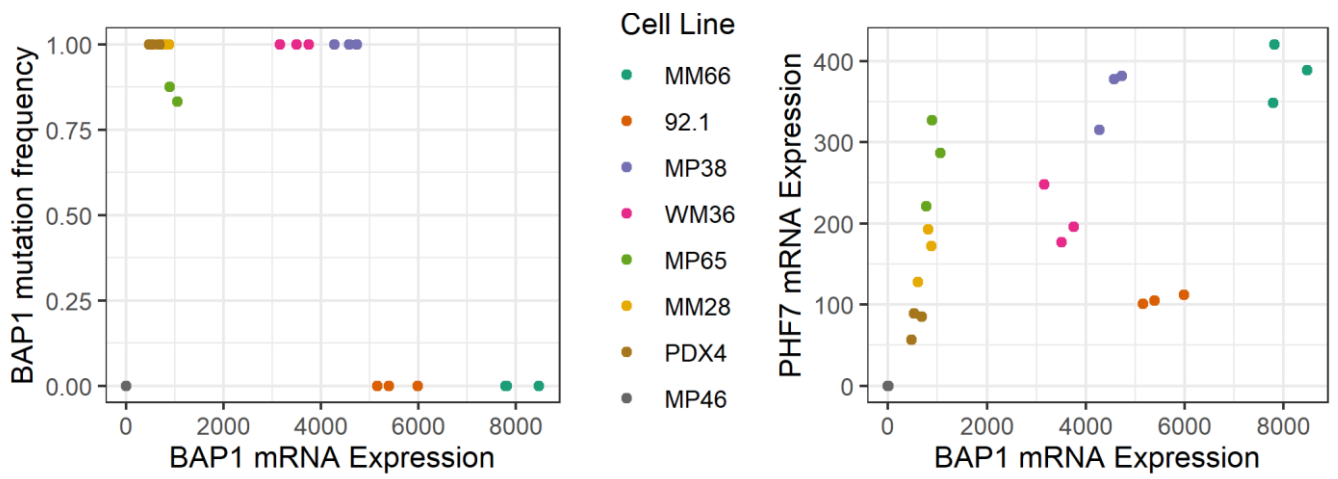

**B**

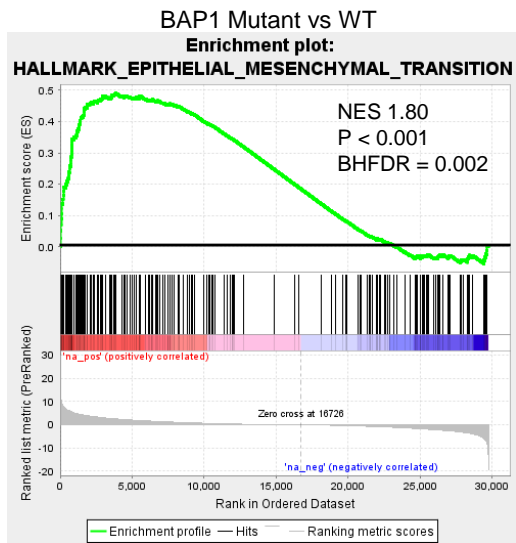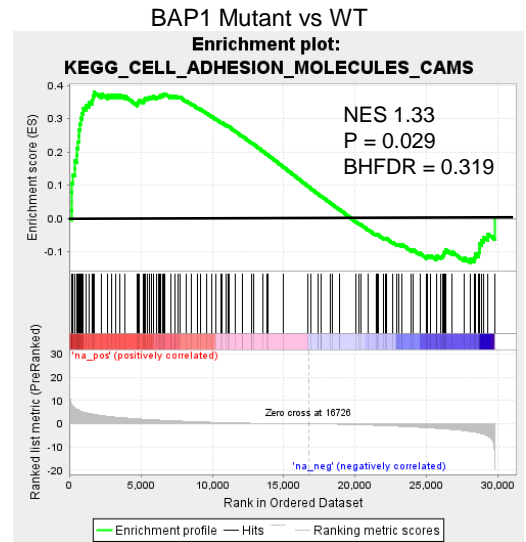

**C**

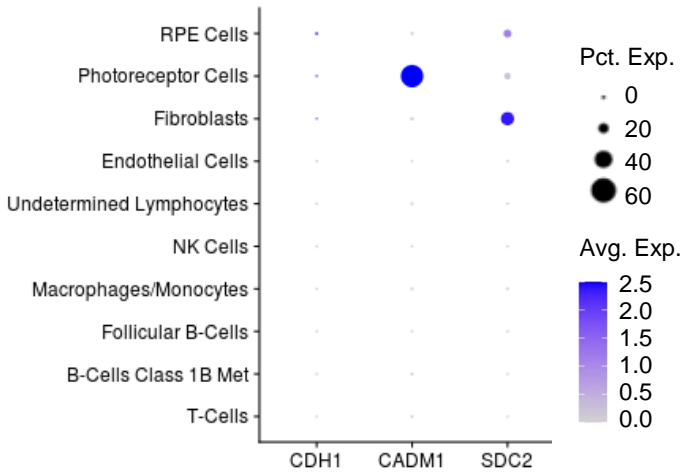

**D**

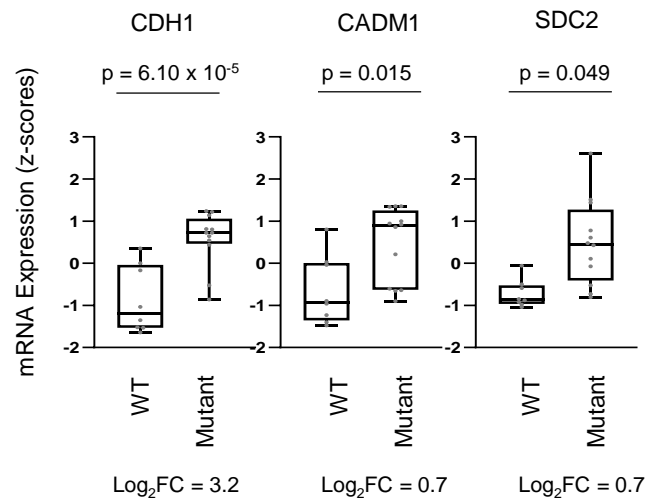

**Supplementary Figure 2: Cell adhesion molecule expression is enriched on cancer cells**

**(A)** Scatter plots showing *BAP1* mRNA expression compared to *BAP1* mutation frequency (left) or *PHF7* mRNA expression (right) for each cell line sample. **(B)** Enrichment plots of Hallmark EMT (left panel) and KEGG CAMs pathway (right panel) gene sets for *BAP1* mutant vs wild-type cell line RNA seq data. **(C)** Dot plots showing the average expression and percent of cells expressing *CDH1*, *CADM1* and *SDC2* in non-malignant cells from all *BAP1* wild-type and mutant UM tumor samples. **(D)** Box plots showing expression of *CDH1*, *CADM1* and *SDC2* in an independent cohort of *BAP1* mutant and wild-type UM cell line samples.

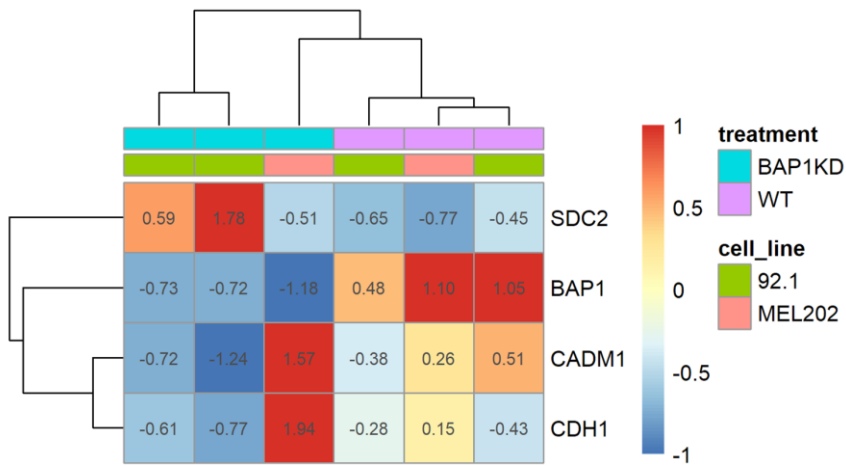

**Supplementary Figure 3: Changes in cell adhesion molecules gene expression due to BAP1 knockdown.** A heatmap showing expression of *BAP1*, *CDH1*, *CADM1*, and *SDC2* in *BAP1* knockdown and wild-type cell line samples.

**A**

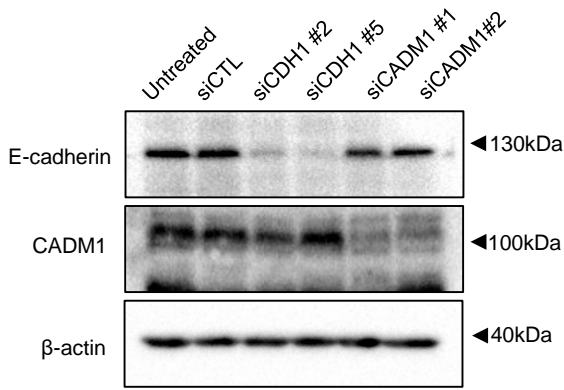

**B**

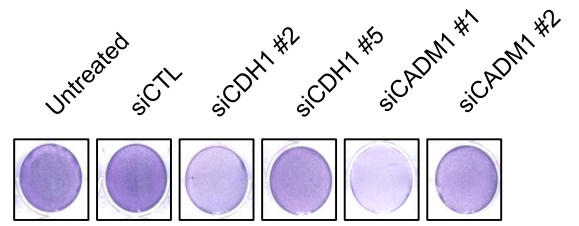

**C**

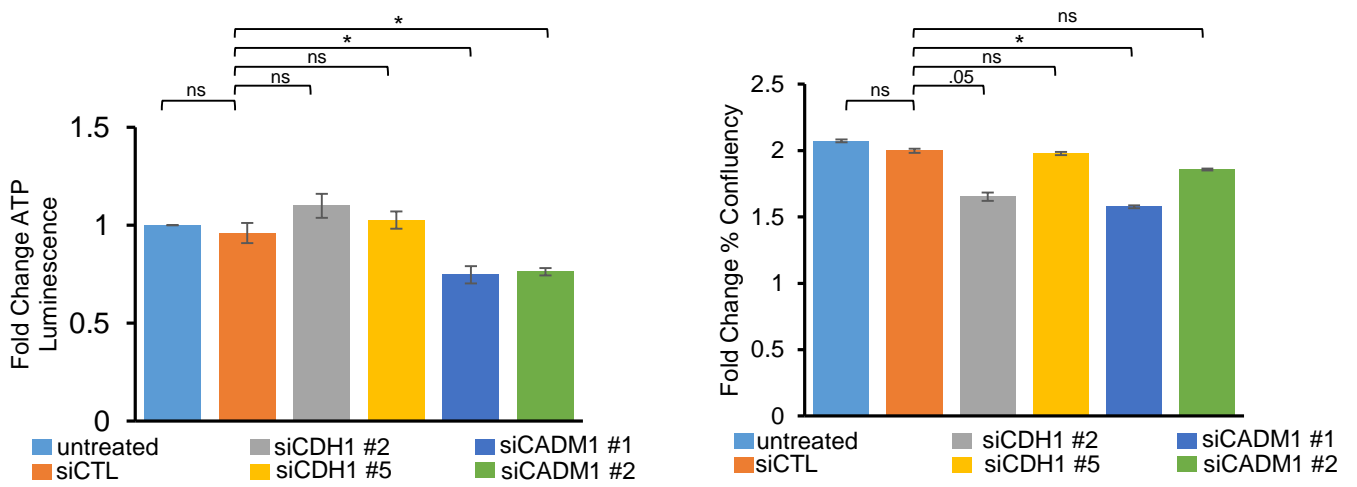

**D**

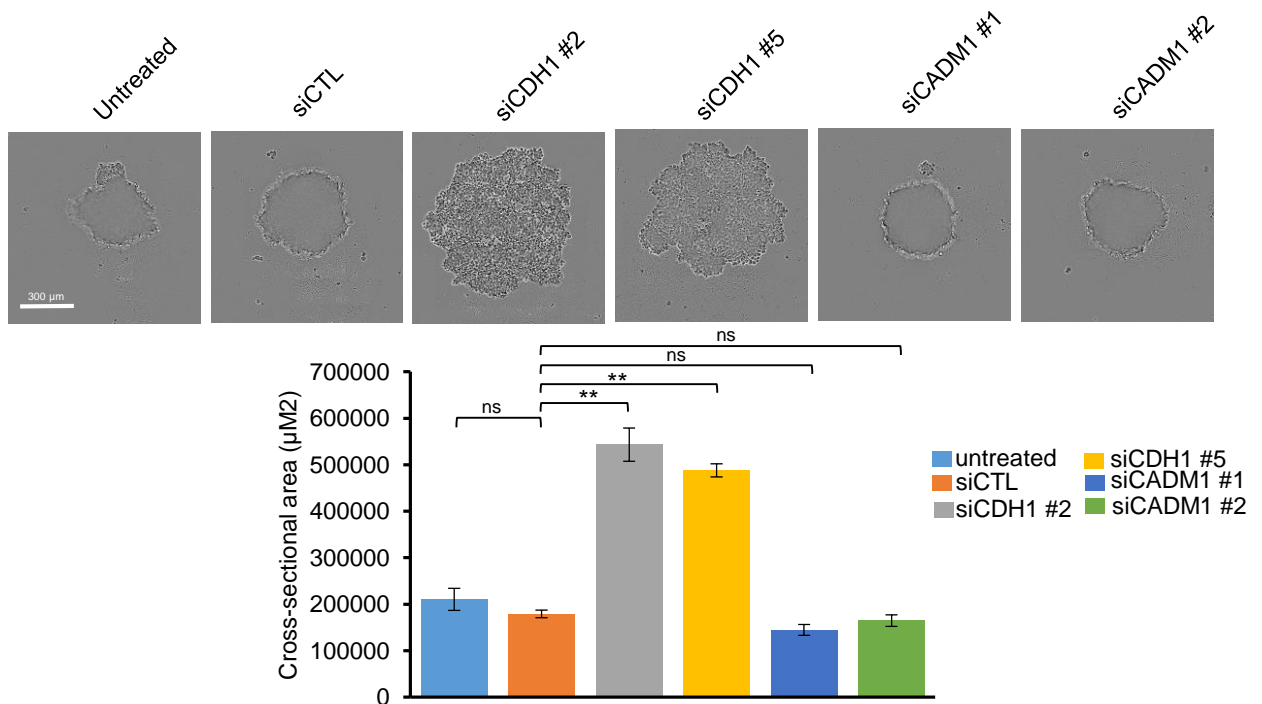

**Supplementary Figure 4: Functional effects of *CDH1* and *CADM1* knockdown on MM28 cell line** (A) Western blot analysis was used to confirm E-cadherin and *CADM1* expression levels with either control, *CDH1*, or *CADM1* siRNAs in MM28 cells. (A) Effect of si*CDH1* and si*CADM1* on MP38 cell growth was analyzed using the IncuCyte Live Cell Analysis Imaging System. Scale bars represent 300  $\mu\text{m}$ . Fold change was calculated as % confluency compared to day 0, \* $p < 0.05$  as determined by t-test, and error bars are  $\pm$ SEM. (C) Effect of si*CDH1* and si*CADM1* on cell viability as measured by ATP luminescence (Cell Titer Glo) after 72 hours in low attachment condition in MM28 cell line, \* $p < 0.05$  as determined by t-test, and error bars are  $\pm$ SEM. (D) Effect of si*CDH1* and si*CADM1* on spheroid size and cluster formation after being cultured on low attachment conditions for 72 hours. Representative images from the IncuCyte Live Cell Analysis Imaging System of MM28 spheroids are from three independent biological replicates. Scale bars represent 300  $\mu\text{m}$ . Quantitation of spheroid size was determined by ImageJ, \* $p < 0.05$  and \*\* $p < 0.01$  as determined by t-test, and error bars are  $\pm$ SEM.

MP38 spheroid data time course

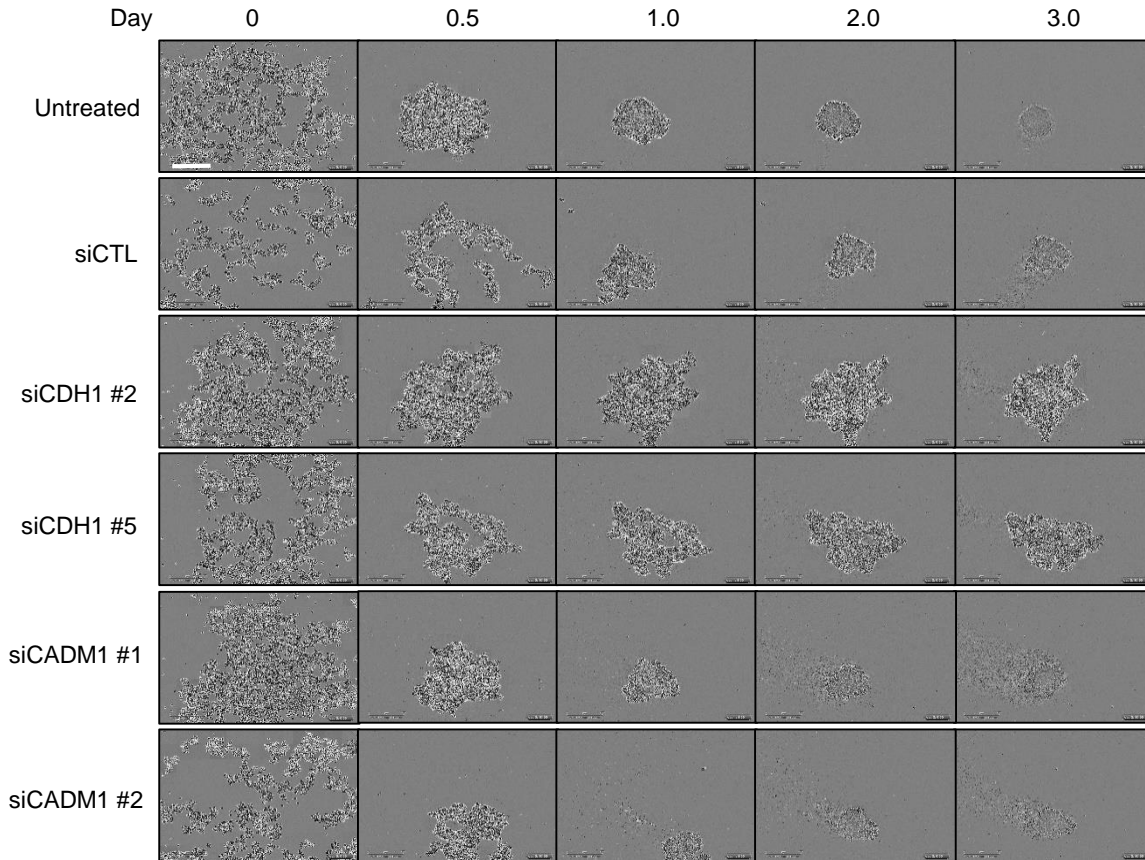

**Supplementary Figure 5: Knockdown of CDH1 effected cluster formation over three days.**

Effect of si*CDH1* and si*CADM1* on spheroid size and cluster formation after being cultured on low attachment conditions for 72 hours. MP38 3D cluster formation was analyzed over time through the IncuCyte Live Cell Analysis Imaging System. Scale bars represent 300  $\mu$ m.
